# Supplementary material for: A qualitative systematic review of the structural barriers accessing ART experienced among subfertile women across Africa and Europe
Source: Research Square preprint supplement (doi:10.21203/rs.3.rs-7932976/v1), 2025-10-31
Supplement: Supplementary file 3 [file 632dc35ebc89398d629f7111.docx]

## Additional File 3: Foreign-born (African and Caribbean) population of the UK

| **Country of birth** | **All usual residents born outside the UK** |
| --- | --- |
| Nigeria | 191183 |
| South Africa | 191023 |
| Jamaica | 160095 |
| Kenya | 137492 |
| Zimbabwe | 118348 |
| Somalia | 101370 |
| Ghana | 93846 |
| Uganda | 59815 |
| Mauritius | 41324 |
| Tanzania | 35237 |
| Egypt | 29821 |
| Zambia | 26822 |
| Algeria | 23929 |
| Sierra Leone | 23118 |
| Trinidad and Tobago | 22872 |
| Guyana | 21417 |
| Morocco | 21246 |
| Democratic Republic of the Congo | 19193 |
| Barbados | 18672 |
| Sudan | 17467 |
| Eritrea | 17282 |
| Malawi | 15714 |
| Ethiopia | 15209 |
| Libya | 15046 |
| Angola | 14253 |
| Gambia | 10950 |
| Cameroon | 9789 |
| Grenada | 9274 |
| Saint Lucia | 9096 |
| Congo | 8037 |
| Ivory Coast (Côte d'Ivoire) | 7718 |
| Saint Vincent and the Grenadines | 7390 |
| Montserrat | 7270 |
| Dominica | 6359 |
| Tunisia | 5832 |
| Mozambique | 5793 |
| Saint Kitts and Nevis | 5629 |
| Jordan | 5589 |
| Rwanda | 4232 |
| Antigua and Barbuda | 3697 |
| Liberia | 3488 |
| Botswana | 2894 |
| Namibia | 2322 |
| Guinea | 2277 |
| Guinea-Bissau | 2266 |
| Senegal | 1908 |
| Bahamas | 1812 |
| Togo | 1594 |
| Swaziland | 1344 |
| Dominican Republic | 1303 |
| Belize | 1252 |
| Papua New Guinea | 1025 |

Additional File 3: UK Demographics
