# Supplementary material for: A qualitative systematic review of the structural barriers accessing ART experienced among subfertile women across Africa and Europe
Source: Research Square preprint supplement (doi:10.21203/rs.3.rs-7932976/v1), 2025-10-31
Supplement: Supplementary file 5 [file 9ff7772e6a70f87d7d18c7cb.docx]

## Additional File 7: Example of Costs for Interventions Additional to Standard IVF

| **Individual Screening of Blood Tests** | Starts at £50 |
| --- | --- |
| **Embryoglue** | Up to £160 |
| **Intralipid Infusions** | Up to £250 |
| **Endometrial Scratch** | Up to £325 |
| **Assisted Hatching** | Up to £450 |
| **Blastocyst Culture** | Up to £800 |
| **Time Lapse Imaging** | Up to £850 for the Eeva time lapse incubator, up to £800 for the Embryoscope |
| **Intracytoplasmic Morphological Sperm Injection (IMSI)** | Up to £1855 |

Additional File 7: Example of Costs for Interventions Additional to Standard IVF
