# Supplementary material for: A qualitative systematic review of the structural barriers accessing ART experienced among subfertile women across Africa and Europe
Source: Research Square preprint supplement (doi:10.21203/rs.3.rs-7932976/v1), 2025-10-31
Supplement: Supplementary file 6 [file cdf99f80c626a24b31ffb4b5.docx]

## Additional File 2: Database Search Strategy

| 1 | Qualitative review* OR "qualitative research” [mh:noexp] |
| --- | --- |
| 2 | (qualitative AND meta-analysis) [mh:noexp] |
| 3 | (qualitative AND systematic review*) OR "qualitative synthesis" [mh:noexp] |
| 4 | meta-ethnography [mh:noexp] |
| 5 | "grounded theory” [mh:noexp] |
| 6 | interview* [mh:noexp] |
| 7 | "focus group” [mh:noexp] |
| 8 | ethnography [mh:noexp] |
| 9 | 1 or 2 or 3 or 4 or 5 or 6 or 7 or 8 |
| 10 | (immigrant* OR migrant* OR refugee* OR Black* OR African OR Africa OR Caribbean* OR afrocaribbean* OR West Indian* OR ethnic minorit* OR race OR racial OR Ghana* OR Egypt* OR Nigeria* OR "South Africa" OR "Sub Saharan Africa" OR Barbados OR Jamaica*) [mh:noexp] |
| 11 | ("United Kingdom" OR UK OR England OR Britain OR British OR GB OR Wales OR Scotland or Ireland OR Belgium OR France OR Germany OR Spain OR Portugal OR Netherlands OR Denmark OR Sweden OR Italy) [mh:noexp] |
| 12 | (subfertil* OR infertil* OR childless OR childlessness OR childbearing OR IVF OR "in-vitro fertilisation" OR "in-vitro fertilization" OR "embryo transfer" OR clomifene OR "embryo harvest" OR "embryo freezing" or "frozen embryo" OR ICSI OR assisted reproductive tech* OR "artificial insemination") [mh:noexp] |
| 13 | ("quality of care" OR "patient centred care" OR "patient satisfaction" OR "patient experience" OR attitud* OR perspective* OR perception* OR view* OR beliefs* OR feeling* OR concern* OR need* OR psycholog* OR suicid* OR "mental health" OR anxiety OR "well being" OR wellbeing OR depression OR risk factor* OR distress OR worries or stress OR stigma* OR cultural) [mh:noexp] |
| 14 | (access OR obstac* OR challeng* OR enabl* or opportunit* OR facilitat* OR accessibility OR availability OR affordability OR barrier OR geograph*) [mh:noexp] |
| 15 | (woman OR women OR female* OR mother* or maternal) [mh:noexp] |
| 16 | 9 AND 10 AND 11 AND 12 AND 13 AND 14 AND 15 |
| Final Search Strategy | (qualitative review* OR qualitative AND systematic review*) OR "qualitative synthesis" OR meta-ethnography OR "meta-synthesis" OR "qualitative research" OR "grounded theory" OR interview* OR "focus group" OR ethnography) AND (immigrant* OR migrant* OR refugee* OR Black* OR African OR Africa OR Caribbean* OR afrocaribbean* OR West Indian* OR ethnic minorit* OR race OR racial OR Ghana* OR Egypt* OR Nigeria* OR "South Africa" OR Kenya* OR Zimbabwe* OR Somalia* OR Liberia OR Uganda* OR Zambia* OR "Trinidad*" OR "Tobago*" OR Sierra Leone* OR Guyana* OR "*Congo*" OR Sudan* OR Malawi* OR Grenada* OR Libya* OR Ethiopia* OR "Saint Vincent and the Grenadines*" OR Dominica* OR Eritrea* OR Angola* OR Gambia* OR "Antigua*" OR Morocco* OR Saint Lucia* OR Mozambique* OR Cameroon* OR Jordan* OR Tunisia* OR Ivory Coast* OR Rwanda* OR Botswana* OR Bahama* OR Namibia* OR "*Guinea*" OR Saint Kitts* OR Montserrat* OR Mauritius* OR Algeria OR Belize* OR Tanzania* OR Senegal* OR Togo* OR Swaziland* OR Dominican* OR “Sub Saharan Africa" OR Barbados OR Jamaica*) AND ("United Kingdom" OR UK OR England OR Britain OR British OR GB OR Wales OR Scotland or Ireland OR Belgium OR France OR Germany OR Spain OR Portugal OR Netherlands OR Denmark OR Sweden OR Italy) AND (subfertil* OR infertil* OR childless OR childlessness OR childbearing OR IVF OR "in-vitro fertilisation" OR "in-vitro fertilization" OR "embryo transfer" OR clomifene OR "embryo harvest" OR "embryo freezing" or "frozen embryo" OR ICSI OR assisted reproductive tech* OR "artificial insemination") AND ("quality of care" OR "patient centred care" OR "patient satisfaction" OR "patient experience" OR attitud* OR perspective* OR perception* OR view* OR beliefs* OR feeling* OR concern* OR need* OR psycholog* OR suicid* OR "mental health" OR anxiety OR "well being" OR wellbeing OR depression OR risk factor* OR distress OR worries or stress OR stigma* OR cultural) AND (access OR obstac* OR challeng* OR enabl* or opportunit* OR facilitat* OR accessibility OR availability OR affordability OR barrier OR geograph*) AND (woman OR women OR female* OR mother* or maternal) |

Additional File 2: Database search strategy

NB: As qualitative research is often regarded as subjective, it was important to ensure that the quality of care and inclusion and exclusion criteria were well defined to ensure I was sensitive to studies that were and were not relevant during the screening process. Thus, although having a second person screening for risk of bias may have been beneficial, for this systematic review, it was not essential in the formation of a robust and reliable answer. Therefore, it is unlikely that the inclusion of a second reviewer would have resulted in a different conclusion.
