# Supplementary material for: A qualitative systematic review of the structural barriers accessing ART experienced among subfertile women across Africa and Europe
Source: Research Square preprint supplement (doi:10.21203/rs.3.rs-7932976/v1), 2025-10-31
Supplement: Supplementary file 7 [file ce387c2a7b3d358efa5df1f6.docx]

## Additional File 6: Methodological Quality

Fledderjohann (2012)

Weinger (2009)

Gerris (1997)

Bailey et al. (2017)

Hollos (2003)

| **Criterion** |  |  |  |  |  |  |
| --- | --- | --- | --- | --- | --- | --- |
| Did the study address a clearly focused issue? | ✓ | ✓ | ✓ | ✓ | ✓ |  |
| Is a qualitative methodology appropriate? E.g., Does the research seek to interpret or illuminate the actions and/or subjective experiences of respondents?; is qualitative research the right methodology for addressing the research goal? | ✓ | ✓ | ✓ | ✓ | ✓ |  |
| Was the research design appropriate to address the aims of the research? E.g., Is the research design justified? | ✓ | ✓ | ✓ | ✓ | ✓ |  |
| Was the recruitment strategy appropriate to the aims of the research? E.g., Selection process explained?; Selected participants most appropriate to provide access to the type of knowledge sought?; Further discussions explaining the reason some chose not to take part? | x | ✓ | N/C | ✓ | x |  |
| Was the data collected in a way that addressed the research issue? E.g., setting for data collection justified?; data collection method (focus group, semi-structured interview etc) made clear?; research method choice justified?; Any modifications to methods explained?; Form of data clear (tape recordings, notes etc)?; Has the researcher discussed saturation? | N/C | ✓ | ✓ | ✓ | N/C |  |
| Has the relationship between researcher and participants been adequately considered? E.g., Is there a critical examination of the role, potential bias and influence during (a) Formulation of research questions; (b) Data collection including sample recruitment and location?; Did the researcher consider implications of any changes in research design? | N/C | ✓ | x | ✓ | x |  |
| Have ethical issues been taken into consideration? E.g., Is there sufficient detail of how the research was explained to participants for the reader to assess whether ethical standards was maintained?; have issues raised by the study been addressed (informed consent, confidentiality, how handled effects of the study on the participants during and after the study)?; approval sought from the ethics committee? | x | N/C | x | N/C | x |  |
| Was the data analysis sufficiently rigorous? E.g., In-depth description of analysis process?; Is it clear how themes were derived from the data?; was the way the presented data selected from the original sample explained to demonstrate analysis process?; sufficient data to support the findings?; is contradictory data taken into account?; potential bias during analysis and data selection critically examined? | N/C | ✓ | N/C | ✓ | N/C |  |
| Is there a clear statement of findings? E.g., Adequate discussion of the evidence both for and against researcher’s arguments?; credibility of findings discussed (triangulation, respondent validation, more than 1 analyst)?; Are findings examined in relation to original research question? | ✓ | ✓ | ✓ | ✓ | ✓ |  |
| How valuable is the research? E.g., Contribution to existing knowledge (current practice or policy)?; identification of new areas where research is necessary?; transferability of research to other populations discussed? | x | ✓ | ✓ | ✓ | x |  |
| **Overall Methodological Quality** | **L** | **M** | **L** | **M** | **L** |  |

Fledderjohann (2012)

Weinger (2009)

Gerris (1997)

Bailey et al. (2017)

Hollos (2003)

| **Criterion** |  |  |  |  |  |  |
| --- | --- | --- | --- | --- | --- | --- |
| Did the study address a clearly focused issue? | ✓ | ✓ | ✓ | ✓ | ✓ | ✓ |
| Is a qualitative methodology appropriate? E.g., Does the research seek to interpret or illuminate the actions and/or subjective experiences of respondents?; is qualitative research the right methodology for addressing the research goal? | ✓ | ✓ | ✓ | ✓ | ✓ | ✓ |
| Was the research design appropriate to address the aims of the research? E.g., Is the research design justified? | ✓ | ✓ | ✓ | ✓ | ✓ | ✓ |
| Was the recruitment strategy appropriate to the aims of the research? E.g., Selection process explained?; Selected participants most appropriate to provide access to the type of knowledge sought?; Further discussions explaining the reason some chose not to take part? | x | N/C | ✓ | ✓ | ✓ | ✓ |
| Was the data collected in a way that addressed the research issue? E.g., setting for data collection justified?; data collection method (focus group, semi-structured interview etc) made clear?; research method choice justified?; Any modifications to methods explained?; Form of data clear (tape recordings, notes etc)?; Has the researcher discussed saturation? | ✓ | ✓ | ✓ | ✓ | ✓ | ✓ |
| Has the relationship between researcher and participants been adequately considered? E.g., Is there a critical examination of the role, potential bias and influence during (a) Formulation of research questions; (b) Data collection including sample recruitment and location?; Did the researcher consider implications of any changes in research design? | N/C | N/C | ✓ | ✓ | ✓ | N/C |
| Have ethical issues been taken into consideration? E.g., Is there sufficient detail of how the research was explained to participants for the reader to assess whether ethical standards was maintained?; have issues raised by the study been addressed (informed consent, confidentiality, how handled effects of the study on the participants during and after the study)?; approval sought from the ethics committee? | N/C | x | N/C | N/C | N/C | ✓ |
| Was the data analysis sufficiently rigorous? E.g., In-depth description of analysis process?; Is it clear how themes were derived from the data?; was the way the presented data selected from the original sample explained to demonstrate analysis process?; sufficient data to support the findings?; is contradictory data taken into account?; potential bias during analysis and data selection critically examined? | N/C | ✓ | ✓ | ✓ | ✓ | ✓ |
| Is there a clear statement of findings? E.g., Adequate discussion of the evidence both for and against researcher’s arguments?; credibility of findings discussed (triangulation, respondent validation, more than 1 analyst)?; Are findings examined in relation to original research question? | N/C | N/C | ✓ | ✓ | ✓ | ✓ |
| How valuable is the research? E.g., Contribution to existing knowledge (current practice or policy)?; identification of new areas where research is necessary?; transferability of research to other populations discussed? | ✓ | ✓ | ✓ | ✓ | ✓ | ✓ |
| **Overall Methodological Quality** | **L** | **L** | **M** | **M** | **M** | **M** |

✓ Yes; x No H High; L Low; M Medium; N/C Not clear

Mariano (2004)

Mogobe (2005)

Yebei (2000)

Dierickx et al. (2018) (2000)

Dierickx et al. (2019) (2000)

Roberts & Franklin (2004)

Additional File 7: Methodological Quality

Mariano (2004)

Mogobe (2005)

Yebei (2000)

Dierickx et al. (2018) (2000)

Dierickx et al. (2019) (2000)

Roberts & Franklin (2004)
